CORRECTION

# Correction: Dietary Diversity, Diet Cost, and Incidence of Type 2 Diabetes in the United Kingdom: A Prospective Cohort Study

The *PLOS Medicine* Staff

The information in the Data Availability section is incorrect. The correct data availability information is as follows: Data from the EPIC Norfolk Study cannot be deposited publicly due to ethics and consent issues. The EPIC-Norfolk data access committee can be contacted at [epic@srl.cam.ac.uk](mailto:epic@srl.cam.ac.uk).

The publisher apologizes for the error.

## Reference

1. Conklin AI, Monsivais P, Khaw K-T, Wareham NJ, Forouhi NG (2016) Dietary Diversity, Diet Cost, and Incidence of Type 2 Diabetes in the United Kingdom: A Prospective Cohort Study. *PLoS Med* 13(7): e1002085. doi: [10.1371/journal.pmed.1002085](https://doi.org/10.1371/journal.pmed.1002085) PMID: [27433799](https://pubmed.ncbi.nlm.nih.gov/27433799/)

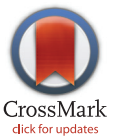

## OPEN ACCESS

**Citation:** The *PLOS Medicine* Staff (2016) Correction: Dietary Diversity, Diet Cost, and Incidence of Type 2 Diabetes in the United Kingdom: A Prospective Cohort Study. *PLoS Med* 13(8): e1002123. doi: [10.1371/journal.pmed.1002123](https://doi.org/10.1371/journal.pmed.1002123)

**Published:** August 19, 2016

**Copyright:** © 2016 The PLOS Medicine Staff. This is an open access article distributed under the terms of the [Creative Commons Attribution License](https://creativecommons.org/licenses/by/4.0/), which permits unrestricted use, distribution, and reproduction in any medium, provided the original author and source are credited.
